# Supplementary material for: Non-Pneumatic Anti-Shock Garment (NASG), a First-Aid Device to Decrease Maternal Mortality from Obstetric Hemorrhage: A Cluster Randomized Trial
Source: PubMed Central journal article supplement (PMC3806786; doi:10.1371/journal.pone.0076477), 2013-10-23
Supplement: pone.0076477.s001.pdf [file pone.0076477.s001.pdf]

**Table S1: Study Sponsored Training Content and Schedule**

|                                                         | <b>Baseline Phase 1</b><br>(No NASG) |          | <b>Baseline Phase 2</b><br>(NASG at RH only) | <b>CRCT Phase 3</b><br>(NASG at RH and Intervention clinics) |                                  |
|---------------------------------------------------------|--------------------------------------|----------|----------------------------------------------|--------------------------------------------------------------|----------------------------------|
|                                                         | PHC staff                            | RH staff | RH staff                                     | PHC Staff at<br>Intervention Clinics                         | PHC Staff at<br>Control Clinics* |
| <b>Training</b>                                         |                                      |          |                                              |                                                              |                                  |
| Study Overview                                          | X                                    | X        | X                                            | X                                                            | X                                |
| Review of Standard Protocol for OH and Shock Management | X                                    | X        | X                                            | X                                                            | X                                |
| Research Ethics and Informed Consent                    | X                                    | X        | X                                            | X                                                            | X                                |
| How to Complete Study Forms                             | X                                    | X        | X                                            | X                                                            | X                                |
| How to Use the NASG                                     |                                      |          | X                                            | X                                                            |                                  |

\*At the conclusion of the study, How to Use the NASG training was conducted with clinic control staff.
